# Supplementary material for: Deciphering the Role of <em>Waxy</em> Gene Mutations in Enhancing Rice Grain Quality: From Molecular Insights to Breeding Soft Rice Varieties
Source: Preprints.org preprint supplement (doi:10.20944/preprints202404.1151.v1), 2024-04-18
Supplement: Supplementary file 4 [file supplementary]

Table S1. Primers used in this study

| Name | Primers (5'-3') | Purpose |
| --- | --- | --- |
| QWx-1 | AAGCTTACTTAGTCTCGATCTGACGTGGTG | Gene amplification, sequencing, and construction of transgenic vectors |
| QWx-2 | CGCCTGCAAAGAACACAAGAACACAACATT |
| QWx-3 | AACAATTCAATTCAGTGCAGAGATCTTCCA |
| QWx-4 | CTCCACAGCCATAAGCCACACCAACT |
| QWx-5C-F | CACTGGAGTTGATCACAAAGACAACC |
| QWx-5C-R | GGTTGTCTTTGTGATCAACTCCAGTG |
| maWx-F | ATTCCTTCAGTTCTTTGTCTATCTCA | RT-qPCR detection |
| maWx-R | ATGGTGGTTGTCTAGCTGTTGC |
| Actin01-F | CCAAGGCCAATCGTGAGAAGA |
| Actin01-R | AATCAGTGAGATCACGCCCAG |
| SPS-F | TTGCGCCTGAACGGATAT | RT-qPCR detection of *Wx* copy number |
| SPS-R | CGGTTGATCTTTTCGGGATG |
| WxN-F | AACTGGATGAAGGCCGGAAT |
| WxN-R | TGTACTTGTCCTTGCTGGGAT |

**
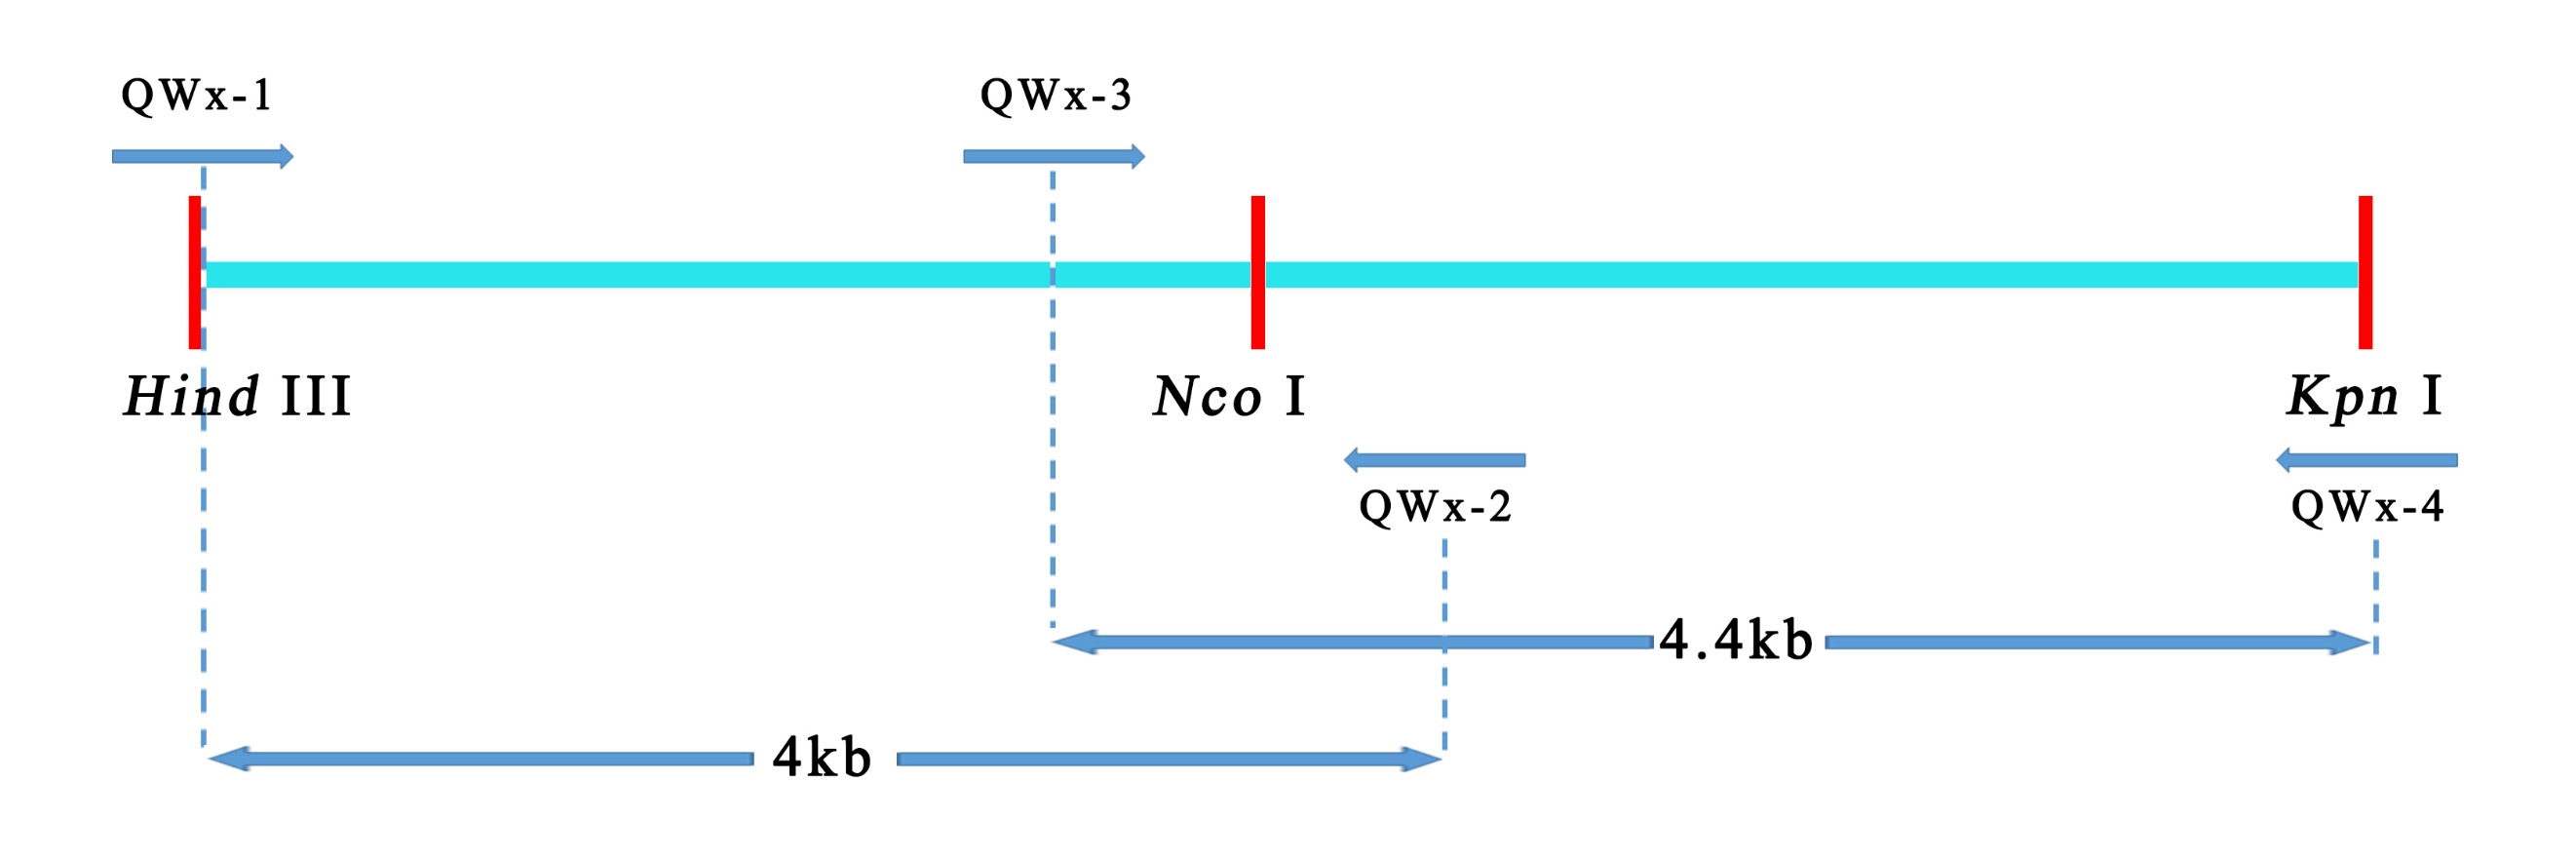
**

**Fig. S1.** The schematic diagram of *Wx* gene structure and the primers used for plasmids construction.


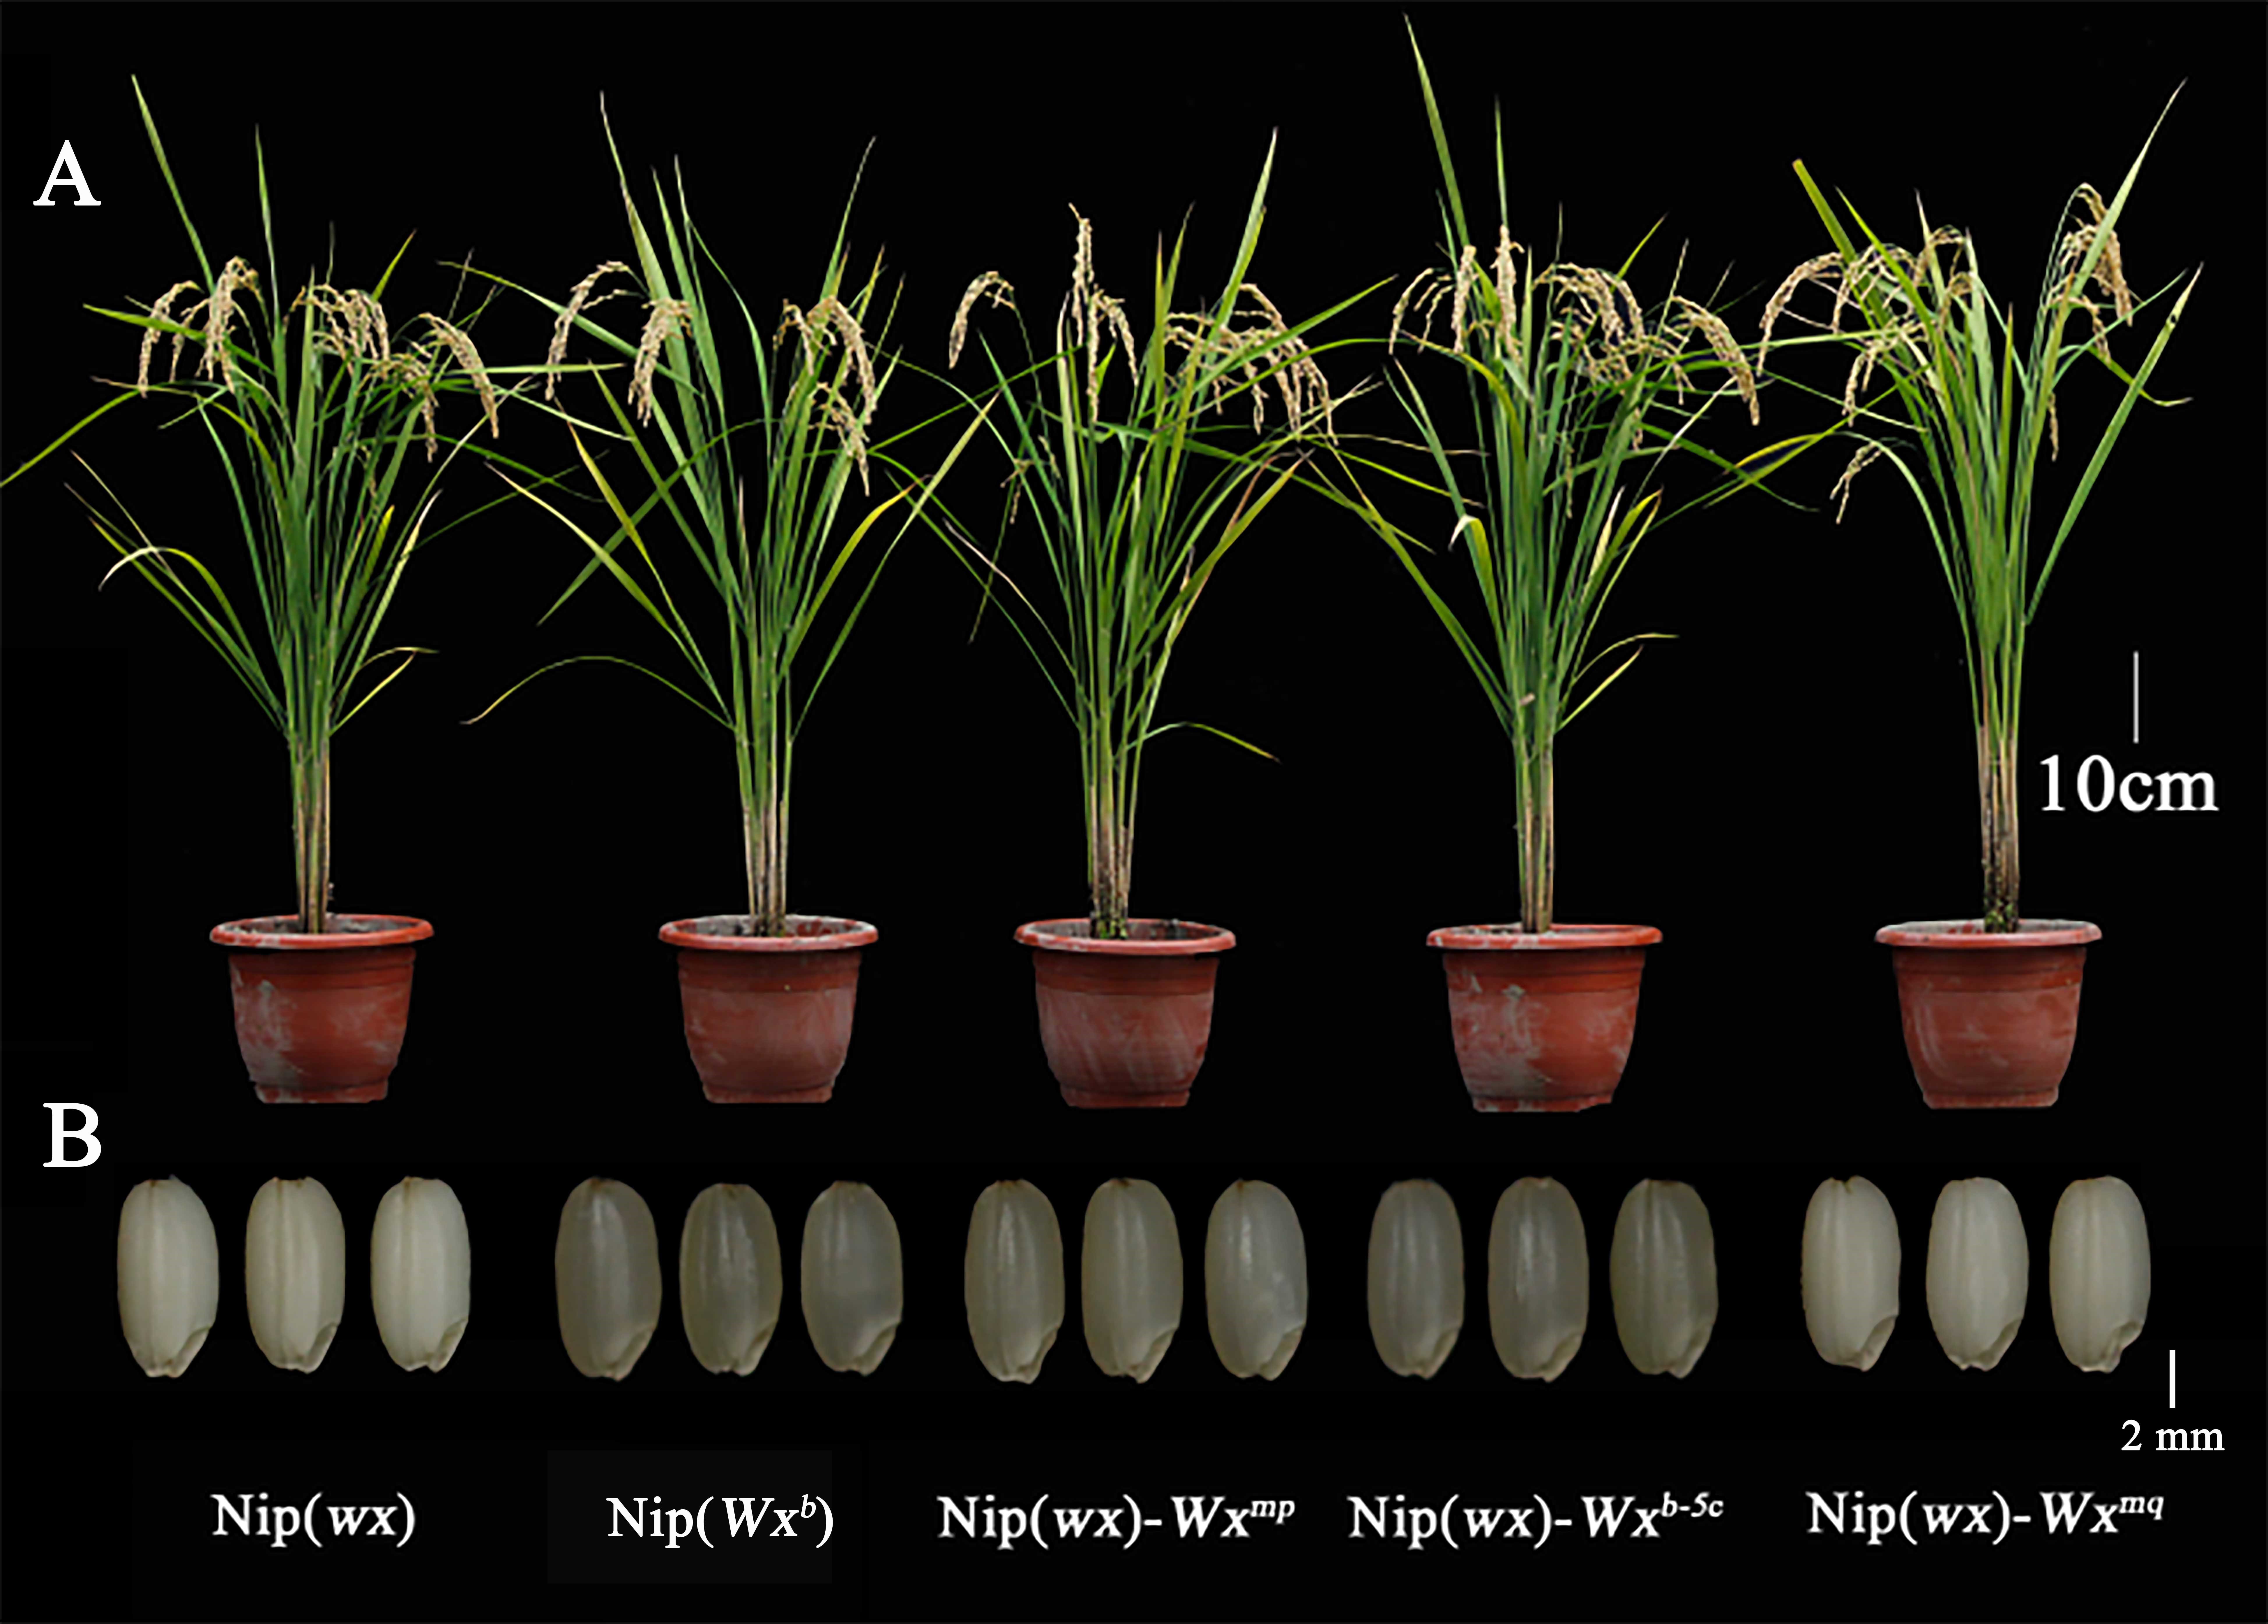


**Fig. S2.** Phenotype of the transgenic rice plants.
